# Supplementary material for: Upregulation of microRNA-1 inhibits proliferation and metastasis of breast cancer
Source: PubMed Central journal article supplement — Mol Med Rep. 2020 May 4;22(1):454–64. doi: 10.3892/mmr.2020.11111 (PMC7248535; doi:10.3892/mmr.2020.11111), 2020-05-04
Supplement: Supplementary_Data.pdf [file Supplementary_Data.pdf]

Figure S1. Patient survival according to the different patient groups. miR-1 low expression was correlated with poor overall survival in patients with luminal-type breast cancer (A), but not in those with human epidermal growth factor receptor 2-positive (B) or triple-negative breast cancers (C). miR, microRNA.

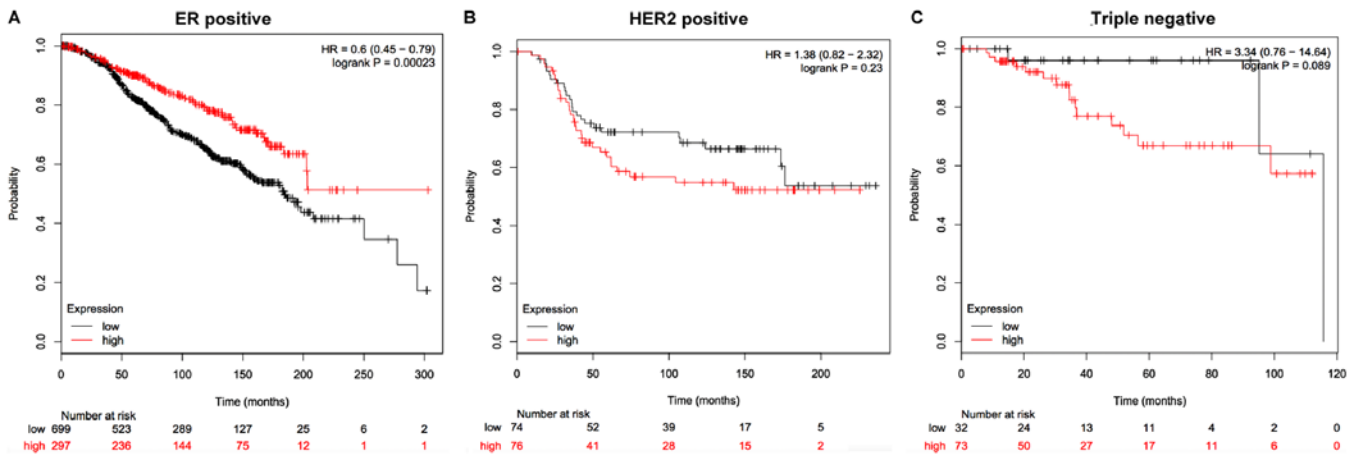

Figure S2. Bcl-2 expression level in ZR-7530 cell line and BC tissues. (A) Examination of important genes that function in the cell cycle and DNA damage. (B) Bcl-2 was expressed at high levels in BC tissues in contrast to normal breast tissues, n=30, P=0.03958. (C) Expression of Bcl-2 mRNA was downregulated following miR-1 overexpression in ZR-7530 cells (n=3, P<0.01). (D) Expression of Bcl-2 mRNA was downregulated following miR-1 overexpression in ZR-7530 cells. BC, breast cancer.

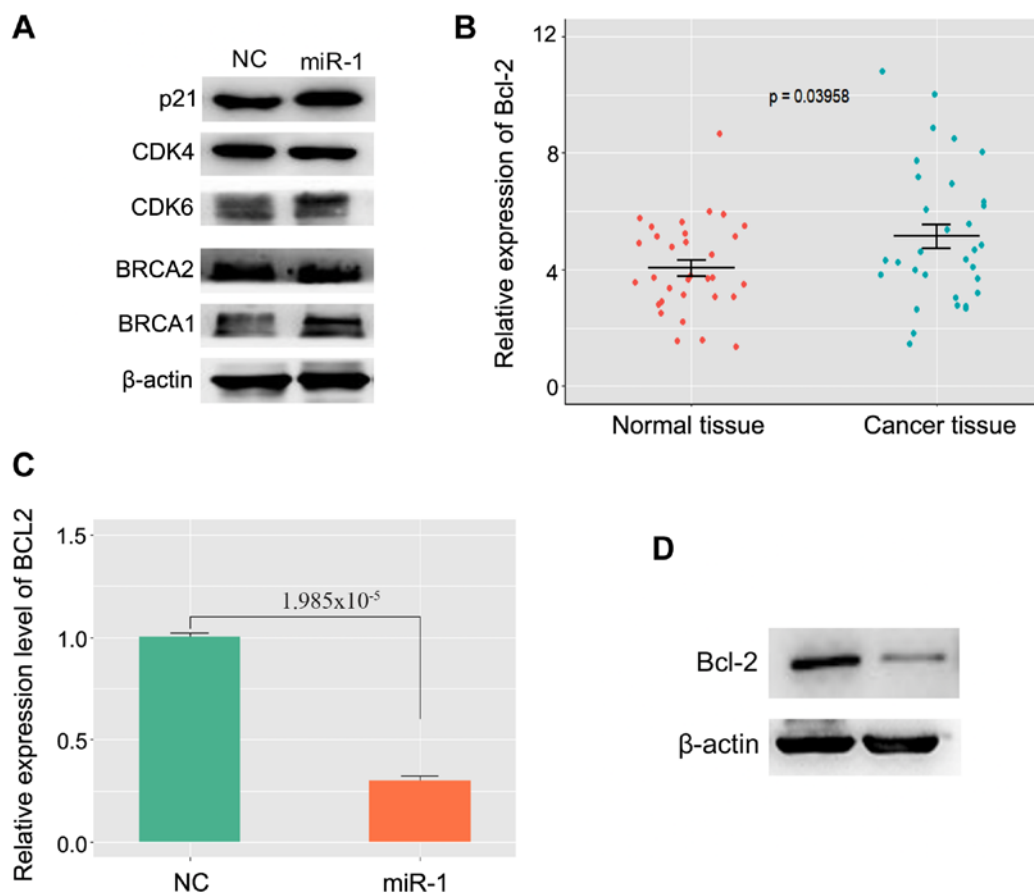

Figure S3. Overexpression of miR-1 inhibits cell migration and invasion by regulating Bcl-2. (A) Overexpression of miR-1 inhibited cell migration, which was reversed by Bcl-2 overexpression (n=3, P<0.01). (B) Overexpression of miR-1 inhibited cell invasion, which was reversed by Bcl-2 overexpression (n=3, P<0.01). miR, microRNA.

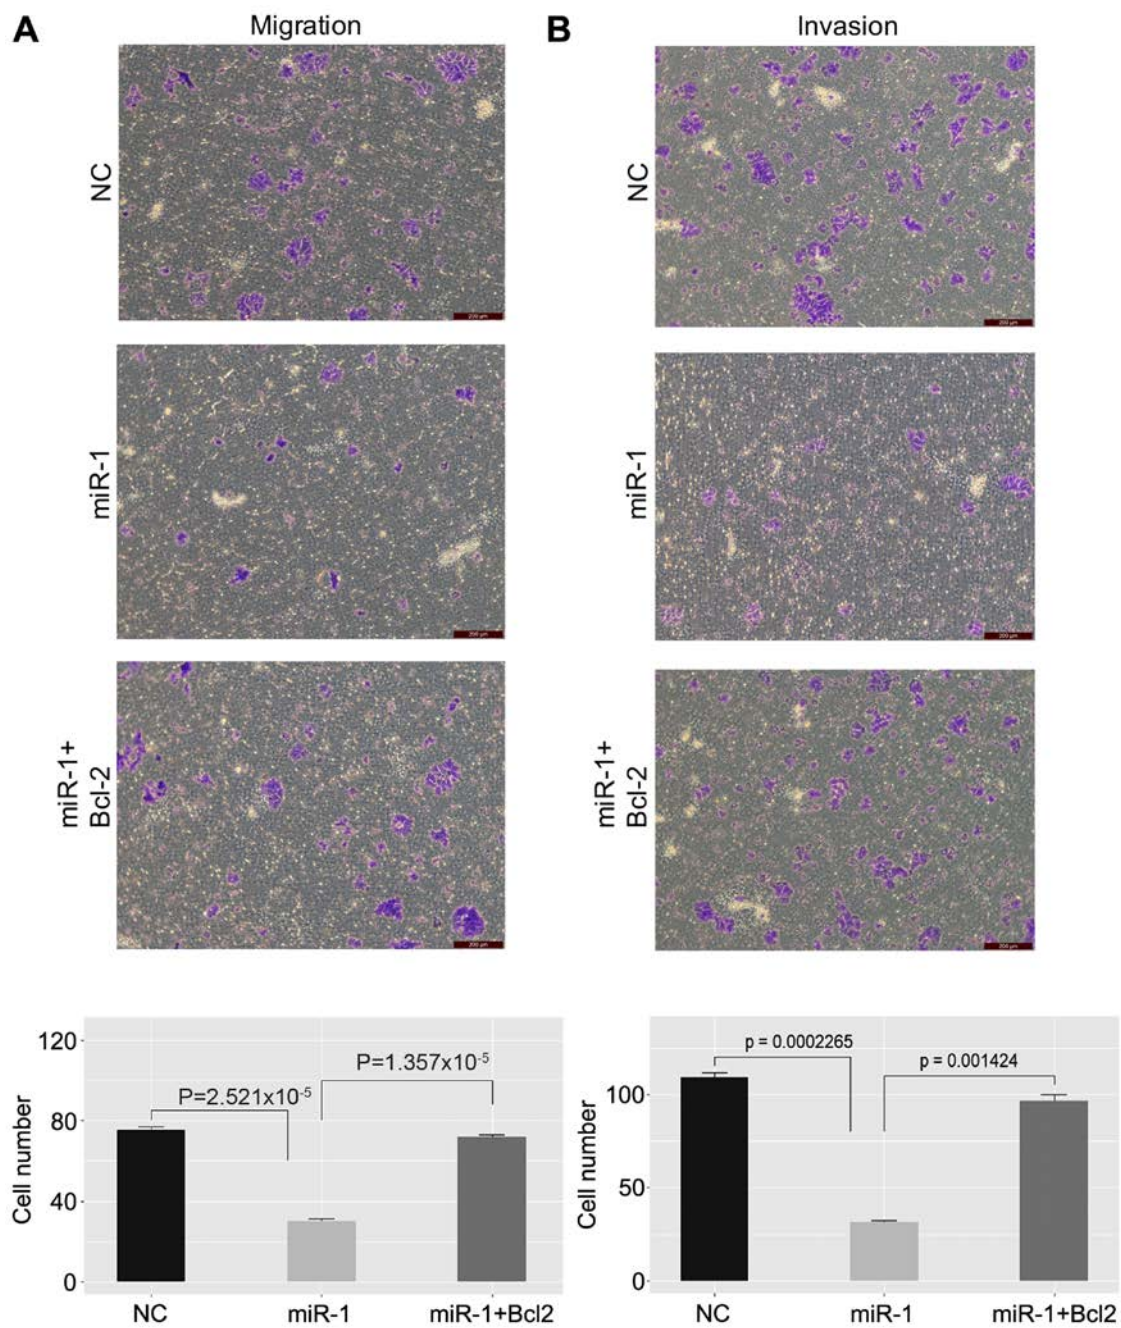

Table SI. Antibodies used in the present study.

| Antibodies        | Company                         | Catalog number |
|-------------------|---------------------------------|----------------|
| $\beta$ -actin    | Sigma-Aldrich; Merck KGaA       | A3854          |
| Akt               | Cell Signaling Technology, Inc. | 4691           |
| Bad               | Cell Signaling Technology, Inc. | 9239           |
| Bax               | Cell Signaling Technology, Inc. | 5023           |
| Bcl-2             | Cell Signaling Technology, Inc. | 2870           |
| Bip               | Cell Signaling Technology, Inc. | 3177           |
| BRCA1             | Abcam                           | ab16781        |
| BRCA2             | Abcam                           | ab27976        |
| CDK4              | Cell Signaling Technology, Inc. | 12790          |
| CDK6              | Cell Signaling Technology, Inc. | 3136           |
| Claudin-1         | Cell Signaling Technology, Inc. | 13255          |
| Cleaved-caspase-7 | Cell Signaling Technology, Inc. | 12827          |
| Cleaved-caspase-9 | Cell Signaling Technology, Inc. | 7237           |
| Cleaved-Parp      | Cell Signaling Technology, Inc. | 5625           |
| E-cadherin        | Cell Signaling Technology, Inc. | 3195           |
| Erk1/2            | Cell Signaling Technology, Inc. | 4695           |
| Mcl-1             | Cell Signaling Technology, Inc. | 5453           |
| p21               | Cell Signaling Technology, Inc. | 2947           |
| Parp              | Cell Signaling Technology, Inc. | 4695           |
| p-Akt             | Cell Signaling Technology, Inc. | 4060           |
| p-Erk1/2          | Cell Signaling Technology, Inc. | 9101           |
| Zeb-1             | Cell Signaling Technology, Inc. | 3396           |

Parp, poly ADP ribose polymerase; p, phosphorylated; CDK, cyclin dependent kinase; E, epithelial; Zeb-1, zinc finger E-box binding homeobox; Mcl-1, myeloid cell leukemia 1; Bip, binding immunoglobulin protein.
